# Supplementary material for: Association between Polymorphisms in the Promoter Regions of Matrix Metalloproteinases (MMPs) and Risk of Cancer Metastasis: A Meta-Analysis
Source: PLoS One. 2012 Feb 14;7(2):e31251. doi: 10.1371/journal.pone.0031251 (PMC3279370; doi:10.1371/journal.pone.0031251)
Supplement: Table S2 — The results of quality evaluation for every included study. (XLS) [file pone.0031251.s002.xls]

## Sheet: Sheet1
Study	Ref	Is the Case Definition	Representativeness	Selection of	Definition of	Comparability of	Ascertainment	Non-Response	Determination for	Total
		Adequate?	of the Cases	Controls	Controls	Cases and Controls	of Exposure	Rate	cases and controls	Score
O-charoenrat 2006	7	1	1	1	1	1	1	1	1	8
Cao 2005	17	1	1	1	1	1	1	1	1	8
Hashimoto 2004	18	1	1	1	1	1	1	1	1	8
Kondo 2005	19	1	1	0	1	1	1	1	1	7
Nasr 2007	20	1	1	1	1	1	1	1	1	8
O-charoenrat 2006	21	1	1	1	1	1	1	1	1	8
Shimizu 2008	22	1	1	1	1	1	1	1	1	8
Kouhkan 2008	23	1	1	1	1	1	1	1	1	8
Ghilardi 2001	24	1	1	0	1	1	1	1	1	7
Woo 2006	25	1	1	0	1	1	1	1	1	7
Jin 2005	26	1	1	1	1	1	1	1	1	8
Matsumura 2004	27	1	1	1	1	1	1	1	1	8
Hughes 2007	28	1	1	0	0	0	1	1	0	4
Przybylowska2006	29	1	1	0	0	0	1	1	0	4
Fang 2005	30	1	1	1	1	1	1	1	1	8
Fong 2004	31	1	1	0	0	0	1	1	0	4
Lai 2005	32	1	1	1	1	1	1	1	1	8
Cotignola 2007	33	1	1	0	0	0	1	1	0	4
Lei2007	34	1	1	1	1	1	1	1	1	8
Wu2007	35	1	1	1	1	1	1	1	1	8
Ghilardi 2002	36	1	1	0	1	1	1	1	1	7
Krippl 2004	37	1	1	1	1	1	1	1	1	8
Tu 2007	38	1	1	0	1	1	1	1	1	7
Zhang 2004	39	1	1	1	1	1	1	1	1	8
Smolarz 2003	40	1	1	0	1	1	1	1	1	7
Xing 2007	41	1	1	1	1	1	1	1	1	8
Wang 2005	42	1	1	1	1	1	1	1	1	8
Matsumura 2005	43	1	1	1	1	1	1	1	1	8
Awakura 2006	44	1	1	1	1	1	1	1	1	8
Zhang 2005	45	1	1	1	1	1	1	1	1	8
Albayrak 2007	46	1	1	0	1	1	1	1	1	7
Wu 2011	47	1	1	1	1	1	1	1	1	8
Park 2011	48	1	1	0	1	1	1	1	1	7
